# Supplementary material for: High-fidelity 3D live-cell nanoscopy through data-driven enhanced super-resolution radial fluctuation
Source: PubMed Central journal article supplement (PMC10703683; doi:10.1038/s41592-023-02057-w), 2023-11-13
Supplement: 41592_2023_2057_MOESM1_ESM.pdf [file 41592_2023_2057_MOESM1_ESM.pdf]

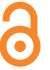

---

# High-fidelity 3D live-cell nanoscopy through data-driven enhanced super-resolution radial fluctuation

---

In the format provided by the authors and unedited

# 1 Supplementary information table-of-contents:

2

3

4 Supplementary Note 1-3

5 Supplementary Table 1-5

6 Supplementary Fig. 1-7

7 Supplementary Movie 1-5

8 References

## 9 Supplementary Notes

### 10 Supplementary Note 1: (e)SRRF and its artifacts

11 The presence of artifacts in the SRRF reconstruction have been observed previously<sup>1</sup>. Here, we  
12 highlight an instance where they appear quite clearly (Supplementary Fig. 2). We generated a  
13 simulated dataset where the underlying fluorophore arrangement follows a fan configuration.  
14 Supplementary Fig. 2 shows the reconstructions obtained from SRRF and eSRRF, as well as  
15 quantitative measures of image quality based on our SQUIRREL method<sup>2</sup>. We observe a clear  
16 visual and quantitative improvement of the method. Both resolution-scaled Pearson coefficient  
17 (RSP) and resolution-scaled error (RSE) show values associated with improved quality.

### 18 Supplementary Note 2: eSRRF processing and analysis concepts

19 The eSRRF approach reconsiders the concepts presented in SRRF and uses knowledge of the  
20 PSF and the imaging set up to enhance the reconstruction. The method consists in a 2-step  
21 process (see Fig. 1): a spatial analysis performed on each image of the temporal stack, creating  
22 the Radial Gradient Convergence (RGC) stack followed by a temporal analysis on the RGC stack.

#### 23 Supplementary Note 2.1: Spatial transformation: the Radial Gradient 24 Convergence transform

25 The SRRF concept exploits the radial symmetry of the signal in the image obtained from a discrete  
26 number of emitters in the image. This analysis requires the calculation of image gradients in every  
27 single pixel of the image<sup>3</sup>. Additionally, the super-resolved image needs to be reconstructed on a  
28 finer pixel grid than the acquisition. Therefore, the first step that we take in the spatial  
29 reconstruction is to spatially interpolate the raw image by a factor set by the user-set *magnification*  
30 parameter. This is done using Fourier Interpolation via Discrete Hartley Transform using  
31 JTransforms 3.1, <https://github.com/wendykierp/JTransforms>. The data is mirror-padded to  
32 represent a  $2^n \times 2^n$  2D data block prior to the FHT and the interpolated image is cropped back down  
33 to the original image width and height after the interpolation. We have shown that FHT

34 interpolation at an early step of the analysis reduces the occurrence of macro-pixel patterning  
 35 (Extended Data Fig. 1). A set of interpolated frames are sent to the GPU defined automatically by  
 36 the reconstruction settings. Subsequent calculations are performed on the GPU.

37  
 38 The vertical and horizontal image intensity gradients are then calculated from the interpolated  
 39 images using the Roberts cross method<sup>4</sup>.

$$40 \quad G_a(i + 0.5, j + 0.5) = I(i, j) - I(i + 1, j + 1)$$

$$41 \quad G_b(i + 0.5, j + 0.5) = I(i, j + 1) - I(i + 1, j)$$

42  
 43 Where  $G_a$  and  $G_b$  represent the 45-degree angle intensity gradients in the interpolated image. By  
 44 using Robert's cross, the gradients calculated correspond to those in the corner of each pixel in  
 45 the original image. These calculations are performed in continuous space based on a Catmull-  
 46 Rom interpolation<sup>5</sup>.

47 The gradients are then rotated by 45 degrees again to be in line with the vertical and horizontal  
 48 axes of the image using standard 45 degrees rotation matrix calculation, so as to obtain  $G_x$  and  
 49  $G_y$  in each pixel  $(i, j)$ . We found that, compared to other methods, Robert's cross generally gives  
 50 the best estimates of local gradients.

51  
 52 Then the RGC transform is calculated for every pixel of the image. The user-input *Radius R* in  
 53 pixels represents the FWHM of the expected PSF, thus, the PSF standard deviation can be  
 54 estimated as follows:

$$55 \quad \sigma = \frac{Radius}{2.355}$$

56  $\sigma$  can be used to calculate the convergence weighting factor  $W$  as well as the size of the relevant  
 57 local area over which to calculate the RGC.

58 For a particular pixel of interest, the RGC is calculated by summing the weighted gradient  
 59 convergence ( $D_k$ ) from all the surrounding pixels in a disk of radius  $2\sigma+1$ , called  $\Delta$ . This radius of  
 60 calculation allows to speed up the process by only using the relevant local information to the pixel  
 61 of interest and was determined empirically.

62 The RGC in the pixel  $(i_0, j_0)$  is computed as follows:

$$63 \quad RGC(i_0, j_0) = \sum_{i, j}^{\Delta} W(i_0, j_0, i, j) \times D_k(i_0, j_0, i, j)$$

64  
 65 For each pixel in  $\Delta$ , the distance  $d$  to the pixel of interest is computed and used to calculate the  
 66 weighting factor  $W$ :

$$67 \quad d = \sqrt{(i - i_0)^2 + (j - j_0)^2}$$

68 and

$$69 \quad W(i_0, j_0, i, j) = W(d) = \left[ d \times e^{-\frac{d^2}{2\sigma^2}} \right]^4$$

70  
 71 Which is based on the 4-th power of the derivative of a Gaussian pattern. Using the derivative of  
 72 the Gaussian pattern allows us to weigh more highly the pixels where a strong gradient would be

73 expected if a molecule was present in the pixel of interest. The 4-th power was empirically derived  
74 to provide the best local gradient sensitivity.

75  
76 The dot product of the gradient vector in the adjacent pixel and the distance vector between the  
77 adjacent and pixel of interest is computed to know the orientation of the gradient vector with  
78 respect to the pixel of interest. If the gradient vector points toward the pixel of interest, the distance  
79 of the tangent is found by taking the cross product of the distance vector and the gradient vectors.  
80 This is similar to what was done before with SRRF. This is used to calculate the gradient  
81 convergence for a particular location pair:  
82

$$83 \quad D_k(i_0, j_0, i, j) = 1 - \frac{|G_y(i, j) \times (i - i_0) - G_x(i, j) \times (j - j_0)|}{d \sqrt{G_x(i, j)^2 + G_y(i, j)^2}}$$

84  
85 This essentially computes the smallest distance between the gradient vector in  $(i, j)$  and the point  
86 of interest  $(i_0, j_0)$ , normalized by the distance between these 2 points.  $D_k$  then becomes 1 if the  
87 gradient points exactly at  $(i_0, j_0)$ , and decreases as the vector points further and further away.  
88

89 NB: the RGC grid and the gradient grid are effectively on the same sized grid but the gradients  
90 are computed on the corner of the pixels whereas the RGC (and interpolated intensities) are  
91 computed on the centre of the pixels.

92  
93 In the last step, to fine-tune the PSF sharpening power, a contrast enhancement of the RGC is  
94 performed by applying the user defined Sensitivity S value as a power to the RGC map.

## 95 Supplementary Note 2.2: Temporal transformation: temporal cross- 96 correlation analysis

97  
98 eSRRF provides three different temporal transformation strategies that each perform best in  
99 different emitter density and fluctuation regimes (see Extended Data Fig. 4). A temporal average  
100 projection (AVG) of the RGC map for each pixel  $(i_0, j_0)$  provides robust results with low sensitivity  
101 to noise, over a wide range of emitter densities.

$$102 \quad AVG(i_0, j_0) = \langle RGC_t(i_0, j_0) \rangle,$$

103  $\langle \dots \rangle$  indicates the average over time. However, an additional resolution improvement can only be  
104 achieved by higher-order temporal correlations. The temporal variance projection (VAR) which  
105 corresponds to cross-cumulant of 1<sup>st</sup> order without temporal offset and the 2<sup>nd</sup> order temporal  
106 auto-cumulant (TAC2) which corresponds to the cross-cumulant of 1st order with offset of 1  
107 frame<sup>5</sup> provide an additional resolution gain with significant improvements in fidelity and contrast  
108 by analysing the temporal fluctuations:

$$109 \quad VAR(i_0, j_0) = \langle \delta RGC_t(i_0, j_0) \cdot \delta RGC_t(i_0, j_0) \rangle,$$

$$110 \quad TAC2(i_0, j_0) = \langle \delta RGC_t(i_0, j_0) \cdot \delta RGC_{t+\delta t}(i_0, j_0) \rangle,$$

111 with  $\delta RGC_t(i_0, j_0) = RGC_t(i_0, j_0) - \langle RGC_t(i_0, j_0) \rangle$ .

112

113  
114 From an implementation point of view, the GPU calculates both the temporal average of the RGC  
115 maps and the temporal average of the square of the RGC maps. The final VAR is then computed  
116 on CPU as follows:

117

$$118 \quad \text{VAR}(i_0, j_0) = \sqrt{\langle RGC^2_t(i_0, j_0) \rangle - \langle RGC_t(i_0, j_0) \rangle^2}$$

119 A similar approach is taken for TAC2.

## 120 Supplementary Note 3: 3D eSRRF using MFM

### 121 Supplementary Note 3.1: General concepts and implementations of 3D 122 eSRRF using MFM

123 (e)SRRF can be extended to provide 3D super-resolution, with resolution improvement in both  
124 lateral and axial directions, as long as the fluctuations of emitters can be captured in 3D. This can  
125 in principle be achieved by any imaging system capable of imaging in 3D with a speed sufficiently  
126 higher than the time scale of the fluctuations of the emitters. However, the most robust way to  
127 ensure this condition is to capture multiple planes in the axial direction simultaneously. MFM<sup>6-8</sup>  
128 offers a robust method for simultaneous acquisition of multiple planes across a large volume,  
129 while retaining diffraction-limited resolution throughout the volume. Briefly, MFM uses a  
130 specialized optical assembly in the detection path of a widefield microscope system. MFM allows  
131 for different planes in the sample volume to be focused on different parts of the camera plane. A  
132 multifocus grating splits the emission into a desired distribution of the diffraction orders while  
133 adding a different defocus to each. A multifaceted blazed grating followed by a multifaceted prism  
134 corrects any chromatic dispersion introduced by the first grating and repositions the images onto  
135 the camera.

136

137 In particular, the MFM microscopy system used in this study was made so that we could measure  
138 emitter fluctuations over a whole volume using Nyquist sampling of the PSF in both lateral and  
139 axial directions. This readily allows eSRRF to extend the reconstruction in the third dimension, as  
140 in this condition, ignoring the different spatial sampling in lateral and axial directions, we can  
141 consider that emitters lead to not axially elongated but spherical patterns in 3D, further simplifying  
142 the extension of the RGC to the axial direction.

143 Therefore, the gradients, convergence weighting factor  $W$  and weighted gradient convergence  
144 described in Supplementary Note 2 can be simply extended to 3D. Once the RGC can be  
145 estimated for the whole volume acquired by MFM, the simultaneous acquisition of all planes can  
146 be extended to a time series of a few hundred frames (in the same way as the 2D acquisition),  
147 and the temporal analysis described in Supplementary Note 2 can also be used.

148 This leads to a full 3D reconstruction applying the eSRRF method from a typical MFM time series  
149 acquisition, without any modifications of the optical MFM set up. We also expect that it may be  
150 possible to perform 3D eSRRF using standard multi-plane imaging system that simply shift the  
151 detection plane axially in the detection arm of the microscopy system, accepting a loss of  
152 resolution due to spherical aberrations, but with some minor adaptation of the 3D eSRRF

153 algorithms taking into account the widening of the fluctuation patterns in space as we move away  
154 from the plane of best focus. In practice, this can be achieved by gradually adapting the *Radius*  
155 parameter across the multiple planes. The advantage of MFM is that this is not necessary.

## 156 Supplementary Note 3.2: MFM and 3D eSRRF registration procedure

157 In MFM, all the different axial planes are obtained simultaneously on the same camera chip but  
158 at different positions. For instance, in the setup used in this study, 9 different planes are acquired  
159 with ~400nm axial steps between them, covering ~3.6um depth into the sample.

160 However, in order to perform eSRRF in 3D (or to do any analysis or visualization in the volume),  
161 it is necessary to know how the different parts of the camera register to each other in 3D: this is  
162 the step of 3D registration.

163 The way the diffraction grating is made determines the relationship between where each plane is  
164 on the camera and where it is in the sample. This relationship is fixed. Their actual registration at  
165 the nanoscale is also defined by the optical alignment and imperfections in the optical assembly.  
166 Therefore, we implemented an analytical procedure to extract the nanoscale registration of each  
167 plane in 3D similarly to what was previously reported in Hajj et al PNAS 2014 and provided the  
168 tool for it as part of the NanoJ-eSRRF package (*3D eSRRF - Get spatial registration from MFM*  
169 *data*).

170 To extract the 3D registration from the data, it is necessary to provide an axial scan through a  
171 sample of defined axial size, such as a layer of fluorescent beads on a coverslip or embedded in  
172 a hydrogel. From this stack, it is possible to recover the position of the same structure in 3D  
173 throughout all the measured planes of the MFM system. This makes it possible for the algorithm  
174 to spatially register the data in the lateral direction, using the same routines as the Drift correction  
175 implemented as part of the NanoJ-Core package<sup>9</sup>. Additionally, the axial position of the identical  
176 plane through the axial stack allows us to extract the axial offset between consecutive planes,  
177 similarly with sub-axial step accuracy.

178 When the registration routine is run on these data, it gives back the 3D registration table for the  
179 imaging setup and spectral channel in question. This table can be used to convert any MFM data  
180 acquired in the same optical setup to a 3D stack using the *3D eSRRF - Apply spatial registration*  
181 *to MFM data* available in the NanoJ-eSRRF package. This routine uses bicubic interpolation to  
182 register the images with the extracted registration parameters. This allows the visualization of any  
183 3D data with renderers like ClearVolume<sup>10</sup> or others.

184 But for (e)SRRF, it is more accurate to use the registration parameters directly in the routine,  
185 avoiding the step of bicubic interpolation performed during the above registration. 3D eSRRF uses  
186 the registration parameters to adjust the location of the different points used to calculate the  
187 gradients and the weighting to automatically align all the data in 3D.

188

## Supplementary Tables

| Method  | Reference                                     | Basic principles                            | Implementation | GPU acceleration | Image quality and resolution validated | 3D                | In depth |
|---------|-----------------------------------------------|---------------------------------------------|----------------|------------------|----------------------------------------|-------------------|----------|
| eSRRF   | this paper                                    | Radiality and temporal cross-correlation    | Fiji           | Yes              | Yes                                    | Yes               | Yes      |
| SRRF    | Gustafsson <i>et al.</i> , 2016 <sup>11</sup> | Radiality and temporal cross-correlation    | Fiji           | Yes              | No                                     | No                | Yes      |
| MUSICAL | Agarwal <i>et al.</i> , 2016 <sup>12</sup>    | Multiple signal classification              | Fiji           | Yes              | No                                     | No                | Yes      |
| 3B      | Cox <i>et al.</i> , 2011 <sup>13</sup>        | Bayesian analysis of blinking and bleaching | Fiji           | Yes              | No                                     | Yes <sup>14</sup> | Yes      |
| SOFI    | Dertinger <i>et al.</i> , 2009 <sup>15</sup>  | Temporal cross-correlation                  | MATLAB         | No               | No                                     | Yes               | Yes      |
| SACD    | Zhao <i>et al.</i> , 2020 <sup>16</sup>       | Deconvolution, temporal cross-correlation   | MATLAB         | No               | No*                                    | Yes <sup>17</sup> | N/A      |

**Supplementary Table 1:** Comparison of fluctuation-based super-resolution microscopy methods. \*FRC resolution estimate based optimization

| Method      | Reference                                 | Basic principles                                                         | Implementation                                   | Artifact reduction | Resolution enhancement | Image quality and resolution validated | 3D  | Live-cell compatible |
|-------------|-------------------------------------------|--------------------------------------------------------------------------|--------------------------------------------------|--------------------|------------------------|----------------------------------------|-----|----------------------|
| eSRRF       | this paper                                | Radiality and temporal auto-correlation                                  | Fiji                                             | Yes                | Yes                    | Yes                                    | Yes | Yes                  |
| CERN        | Zeng <i>et al.</i> , 2020 <sup>18</sup>   | cross-cumulant analysis and SRRF                                         | MATLAB & Fiji                                    | Yes                | Yes                    | No                                     | No  | Yes                  |
| JT-SRRF     | Zeng <i>et al.</i> , 2018 <sup>19</sup>   | Emitter density reduction by joint tagging with spectrally separated QDs | Sample preparation                               | No                 | Yes                    | No                                     | No  | No                   |
| gmSRRF      | Gong <i>et al.</i> , 2021 <sup>20</sup>   | Gradient variance modified SRRF                                          | MATLAB                                           | Yes                | Yes                    | No                                     | No  | Yes                  |
| (Ex-) FEAST | Wang <i>et al.</i> , 2020 <sup>20</sup>   | Airyscan imaging with SRRF processing (of expanded samples)              | Airyscan imaging (and expansion microscopy)      | No                 | Yes                    | No                                     | No  | Yes (not for QD/Ex)  |
| ONE         | Shaib <i>et al.</i> , 2022 <sup>21</sup>  | Confocal or WF imaging of 10x expanded samples and SRRF processing       | Fiji                                             | No                 | Yes                    | No                                     | No  | No                   |
| ExSRRF      | Kylies <i>et al.</i> , 2023 <sup>22</sup> | WF imaging of 4x expanded tissue samples and SRRF processing             | LED-based WF microscopy and expansion microscopy | No                 | Yes                    | No                                     | No  | No                   |

**Supplementary Table 2:** Recent adaptations and extensions of SRRF. Abbreviations: CERN - cross-cumulant enhanced radiality nanoscopy, JT - joint tagging, QD - Quantum dot, gmSRRF - gradient variance modified SRRF, (Ex-)FEAST - fluctuation-enhanced Airyscan technology (and sample expansion microscopy), ONE - one nanometer expansion microscopy



| <b>Parameter</b>           | <b>Description</b>                                                                                                         |
|----------------------------|----------------------------------------------------------------------------------------------------------------------------|
| Magnification $M$          | Define how the camera pixels are split into sub-pixels for the RGC estimation.                                             |
| Radius $R$                 | Define the receptive field size that is used to calculate the RGC, the size should represent the FWHM of the expected PSF. |
| Sensitivity $S$            | Define the sensitivity factor to fine-tune the PSF sharpening power applied by the RGC.                                    |
| Number of frames for eSRRF | Define the size of the frame window for the temporal analysis.                                                             |
| Vibration correction       | Activate vibration correction based on cross correlation.                                                                  |
| Temporal analysis method   | Select AVG, VAR and/or TAC2 as a temporal analysis method.                                                                 |
| Rolling analysis           | Activate rolling analysis and define frame gap size to increase temporal sampling by interleaved reconstruction.           |
| 3D eSRRF                   | Activate 3D eSRRF analysis and define offset between axial planes in nm.                                                   |

**Supplementary Table 3: eSRRF parameters**

| Dataset                                                    | Figure panel                          | Laser intensity        | Imaging speed/time | Analysis parameters                                              | Resolution estimate<br>mean $\pm$ standard deviation                                                                                                                                                                                      |
|------------------------------------------------------------|---------------------------------------|------------------------|--------------------|------------------------------------------------------------------|-------------------------------------------------------------------------------------------------------------------------------------------------------------------------------------------------------------------------------------------|
| DNA-PAINT of microtubule network in fixed COS-7 cells      | Graphical Abstract a), 1, S1, ED4, S3 | 1 kW/cm <sup>2</sup>   | 33 Hz/25 min       | eSRRF: M=5, R=0.5, S=1, VAR, all frames<br>SRRF: M=5, R=0.5, A=6 | WF:<br>FRC = 215 $\pm$ 20 nm<br>Decorrelation = 424 nm<br>eSRRF:<br>FRC = 84 $\pm$ 11 nm,<br>Decorrelation = 129 nm<br>SRRF:<br>FRC = 112 $\pm$ 40 nm,<br>Decorrelation = 131 nm<br>SMLM<br>FRC = 71 $\pm$ 2 nm,<br>Decorrelation = 82 nm |
| COS-7 cells expressing Lyn kinase – SkylineS <sup>23</sup> | 2                                     | 39 W/cm <sup>2</sup>   | 33 Hz/15s          | M=4, R=1.5, S=4, VAR, 200 frames                                 | -                                                                                                                                                                                                                                         |
| Live-cell LLS of the ER in Jurkat cells                    | 3b-c), M2                             | n/a                    | 100 Hz/130 s       | M=5, R=3.5, S=2, AVG, 100 frames                                 | WF:<br>FRC = 164 $\pm$ 9<br>Decorrelation = 455 nm<br>eSRRF:<br>FRC = 84 $\pm$ 43 nm<br>Decorrelation = 207 nm                                                                                                                            |
| Live-cell HiLO-TIRF microscopy of ER in COS-7              | 3d), ED1, ED7, M3                     | 123 mW/cm <sup>2</sup> | 95 Hz/60 s         | M=5, R=2, S=1, AVG, 100 fr, rolling analysis gap=10 frames       | WF:<br>FRC = 254 $\pm$ 11 nm<br>Decorrelation = 637 nm<br>eSRRF:<br>FRC = 143 $\pm$ 56 nm,<br>Decorrelation = 255 nm                                                                                                                      |

|                                                                               |            |                                                                    |                    |                                                                            |                                                                                                                                                                                                                                                                                                                                                                                                                                                                |
|-------------------------------------------------------------------------------|------------|--------------------------------------------------------------------|--------------------|----------------------------------------------------------------------------|----------------------------------------------------------------------------------------------------------------------------------------------------------------------------------------------------------------------------------------------------------------------------------------------------------------------------------------------------------------------------------------------------------------------------------------------------------------|
| Live-cell MFM of mitochondria network in HeLa cells (set1/set2)               | 4, ED10/M5 | 21.4 W/cm <sup>2</sup> /11.5 W/cm <sup>2</sup> *                   | 50 Hz/20 s-3min20s | M=4, R=2, S=1, AVG, 100 frames, rolling analysis gap=25 frames             | WF:<br>FRC(xy) = 231 ± 10 nm/317 ± 22 nm<br>Decorrelation(xy) = 481 nm/486 nm<br>FRC(xz)=-/-<br>Decorrelation(xz) = 490 nm/483 nm<br>eSRRF:<br>FRC(x,y) = 74 ± 12 nm/124±60 nm<br>Decorrelation(xy) = 184 nm/239 nm<br>FRC(xz) = 173 ± 19 nm/222 ± 26 nm<br>Decorrelation(xz) = 236 nm/285 nm<br>Deconvolved:<br>FRC(x,y) = 197.0±7.1 nm/146 ±58 nm<br>Decorrelation(xy) = 285 nm/272 nm<br>FRC(xz) = 297±89 nm/244±20 nm<br>Decorrelation(xz) = 421 nm/300 nm |
| ARGO-SIM calibration slide                                                    | ED2, ED6   | -                                                                  | 86 Hz/1min         | eSRRF: M=2, R=1, S=2, AVG, 5000 fr<br>SRRF: M=2, R=0.6, A=2, TRPPM, 5000fr | -                                                                                                                                                                                                                                                                                                                                                                                                                                                              |
| Life-cell SIM imaging of cultured neurons expressing Tubulin-eGFP             | ED5a)      | 488 nm: 15.1 W/cm <sup>2</sup>                                     | 5 Hz, 1.8s         |                                                                            | WF:<br>FRC = 253±74 nm<br>Decorrelation = 297 nm<br>SIM:<br>FRC= 202±47 nm<br>Decorrelation= 117 nm                                                                                                                                                                                                                                                                                                                                                            |
| Live-cell TIRF imaging of cultured neurons expressing SkyJanNS tagged tubulin | 3a), ED5b) | 405 nm: 0.727 W/cm <sup>2</sup><br>488 nm: 0.682 W/cm <sup>2</sup> | 10 Hz, 20s         | eSRRF: M=4, R=5, S=2, VAR, 200 fr<br>SRRF: M=2, R=3, A=6, 200 fr           | WF:<br>FRC =: 425±42 nm<br>Decorrelation = 339 nm,<br>SRRF:<br>FRC = 213±41 nm<br>Decorrelation: 132 nm,<br>eSRRF:                                                                                                                                                                                                                                                                                                                                             |

|                                                                                                    |       |                            |           |                                     |                                                                                                                                                                                                                                                                           |
|----------------------------------------------------------------------------------------------------|-------|----------------------------|-----------|-------------------------------------|---------------------------------------------------------------------------------------------------------------------------------------------------------------------------------------------------------------------------------------------------------------------------|
|                                                                                                    |       |                            |           |                                     | FRC = 193±51 nm<br>Decorrelation: 125 nm                                                                                                                                                                                                                                  |
| Nuclear pore complex in fixed isolated nuclear envelopes (Dataset from Heil et al. <sup>24</sup> ) | S4    | 5 kW/cm <sup>2</sup>       | 200Hz     | M=10,R=3,S=10, AVG, 2000 fr/20000fr | WF:<br>FRC = 410 nm<br>Decorrelation = 384 nm<br>eSRRF:<br>FRC (2000 fr)=44.4±2.5 nm,<br>Decorrelation (2000 fr)= 80 nm<br>Decorrelation (20000 fr)= 66 nm<br>SMLM:<br>FRC (20000 fr): 35.1±6.3 nm<br>Decorrelation (2000 fr) = 51 nm<br>Decorrelation (20000 fr) = 41 nm |
| Live-cell SDC of U2OS cells in PAM                                                                 | ED8a) | 4.6 W/cm <sup>2*</sup>     | 10 Hz/10s | M=5, R=2, S=1, AVG, 100 frames      | WF:<br>FRC=573.0±7.2 nm<br>Decorrelation=1030 nm<br>eSRRF:<br>FRC=197±34 nm<br>Decorrelation=260 nm                                                                                                                                                                       |
| Two-color SDC of fixed spheroids (collagen I/actin)                                                | ED8b) | 4.6/2.6 W/cm <sup>2*</sup> | 10 Hz/10s | M=5, R= 2/3, S=1, AVG, 100 frames   | WF:<br>FRC(Actin)= 569±59 nm<br>FRC(Collagen I)= 583±14 nm,<br>Decorrelation(Actin)= 624 nm<br>Decorrelation(Collagen I)= 620 nm)<br>eSRRF:<br>FRC(Actin)= 229±97 nm<br>FRC(Collagen I)= 130±36 nm,<br>Decorrelation(Actin)= 370 nm<br>Decorrelation(Collagen I)= 204 nm  |
| In-vivo SDC of zebrafish                                                                           | ED8c) | 2.6 W/cm <sup>2*</sup>     | 10 Hz/10s | M=5, R= 2, S=1, AVG, 150 frames     | WF:<br>FRC(top)= 641±82 nm                                                                                                                                                                                                                                                |

|                                                              |         |                                                                      |                                  |                                 |                                                                                                                                                                                                                                                                                                                                                                            |
|--------------------------------------------------------------|---------|----------------------------------------------------------------------|----------------------------------|---------------------------------|----------------------------------------------------------------------------------------------------------------------------------------------------------------------------------------------------------------------------------------------------------------------------------------------------------------------------------------------------------------------------|
|                                                              |         |                                                                      |                                  |                                 | <p>FRC(middle)= 573.9±5.7 nm<br/> FRC(bottom)= 575.9±7.9 nm<br/> Decorrelation(top)= 1026 nm<br/> Decorrelation(middle)= 998 nm<br/> Decorrelation(bottom)= 1006 nm<br/> eSRRF:<br/> FRC(top)= 194±37 nm<br/> FRC(middle)= 393±23 nm<br/> FRC(bottom)= 307±60 nm<br/> Decorrelation(top)= 236 nm<br/> Decorrelation(middle)= 215 nm<br/> Decorrelation(bottom)= 263 nm</p> |
| Live-cell SDC imaging of U2OS cells expressing SkylnS-βActin | 3e), M4 | 405 nm: 0.290 W/cm <sup>2</sup> ,<br>488 nm: 0.766 W/cm <sup>2</sup> | 2 Hz/12h 10min, 10 min intervals | M=5, R=2.5, S=1, AVG, 50 frames | <p>WF:<br/> FRC = 484 ± 53 nm<br/> Decorrelation = 903 nm<br/> eSRRF:<br/> FRC = 151 ± 77 nm<br/> Decorrelation = 435 nm<br/> SRRF:<br/> FRC = 215 ± 63 nm<br/> Decorrelation = 475 nm</p>                                                                                                                                                                                 |

**Supplementary Table 4:** Laser intensities, imaging speed, total imaging time, eSRRF and SRRF parameters and resolution estimates (FRC and Decorrelation analysis) for the data sets included in this paper. \*Intensity at the coverslip surface.

| Method     | Reference                                                                               | Basic principles                                                                   | Type                                                         | Implementation | Volume ( $\mu\text{m}^3$ ) | Speed intrinsic/SR (Vol/sec) |
|------------|-----------------------------------------------------------------------------------------|------------------------------------------------------------------------------------|--------------------------------------------------------------|----------------|----------------------------|------------------------------|
| 3D eSRRF   | this paper                                                                              | MFM + eSRRF                                                                        | Fluctuation analysis on specialized hardware                 | Fiji-Plugin    | 20x20x3.6                  | 50 Hz/~1 Hz (live-cell)      |
| 3D SOFI    | Geissbuehler <i>et al.</i> 2014 <sup>25</sup> /Descoux <i>et al.</i> 2018 <sup>26</sup> | MFM+SOFI                                                                           | Fluctuation analysis on specialized hardware                 | Matlab library | 65x65x3.5/<br>50x50x2.5    | 40 Hz/~1Hz (live-cell)       |
| RFBA       | Chen <i>et al.</i> 2020 <sup>14</sup>                                                   | Bessel light sheet + SRRF guided 3B                                                | Fluctuation analysis on specialized hardware                 | Matlab/C++     | 216x13.8x14                | 0.42 Hz/0.014 Hz (live-cell) |
| IDDR-SPIM  | Zhao <i>et al.</i> 2022 <sup>27</sup>                                                   | Double-ring -modulated SPIM + deep-learning SRM                                    | Deep-learning based super-resolution on specialized hardware | Python         | 10x220x13                  | ~17 Hz/~17 Hz (live-cell)    |
| RIM        | Mangeat <i>et al.</i> 2021 <sup>28</sup>                                                | Speckled illumination + SOFI/SIM reconstruction                                    | Fluctuation analysis on specialized hardware                 | C++            | 30x30x0.8                  | ~20 Hz/0.2 Hz (live-cell)    |
| 3DpRESOLFT | Bodén <i>et al.</i> 2021 <sup>29</sup>                                                  | Parallelized stimulated emission depletion with RSFPs and 3D interference patterns | Specialized hardware                                         | -              | 40x40x1.6                  | -/0.1 Hz                     |

**Supplementary Table 5:** Live-cell 3D super-resolution methods. Abbreviations: RFBA - radial fluctuation Bayesian analysis, 3B - Bayesian analysis of blinking and bleaching, SPIM - selective plane illumination microscopy, RIM - random illumination microscopy, 3DpRESOLFT - 3D, parallelized, reversible, saturable/switchable optical fluorescence transition microscopy, RSFPs - reversibly switchable fluorescent proteins

## Supplementary Figures

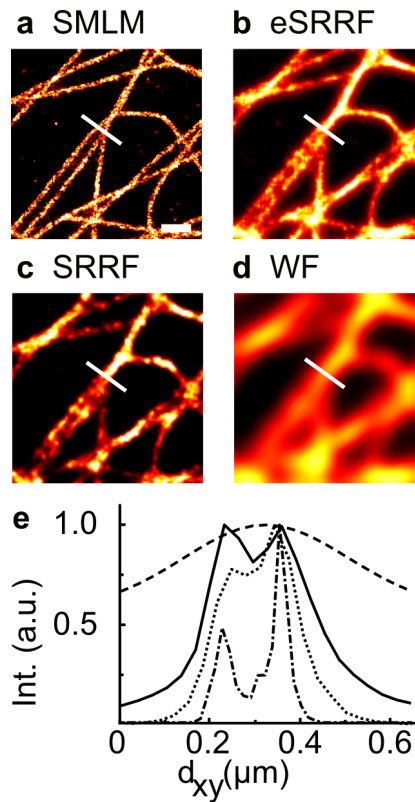

**Supplementary Fig. 1: Resolution improvement of eSRRF vs. SRRF.** Image sections of the data set presented in Fig. 1 after **a** SMLM image reconstruction, **b** eSRRF processing, **c** SRRF processing and **d** as WF data. The white line indicates the position of the line profiles. **e** Intensity profiles allow to distinguish two filaments in the SMLM reconstruction (dash-dotted line) which can also be resolved with eSRRF (solid line) but the presence of a second filament is unclear in the case of SRRF processing (dotted line) and for the WF data (dashed line). Scale bar: 500 nm.

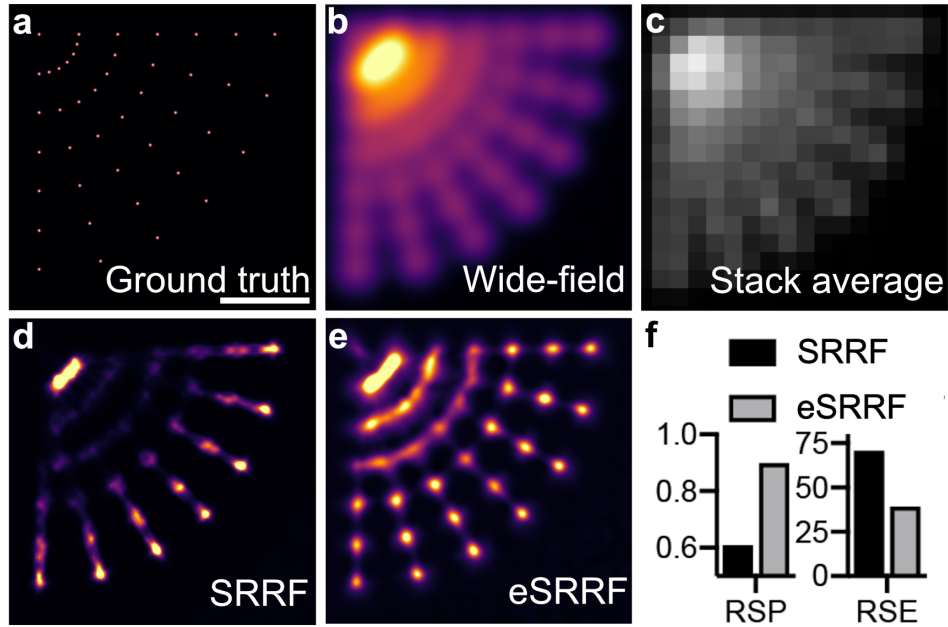

**Supplementary Fig. 2: Performance improvement of eSRRF on simulated data.** **a** Simulated ground truth indicating the positions of individual molecules placed on concentric rings with radii increasing by 220 nm steps. On each ring the molecules are separated by 57.5, 115, 173, 230, 288 and 345 nm, respectively. **b** Interpolated wide-field image. **c**, Average of all simulated raw frames **d**, SRRF image (R = 1, A = 6, 500 fr, TRAC2) **e**, eSRRF image (R = 1, S = 1, 500 fr, TAC2). **f** Quantitative comparisons of SRRF and eSRRF based on RSP and RSE obtained from SQUIRREL. Artifacts like the linearity loss and and over sharpening as they are observed in **d** are significantly reduced with **e**, eSRRF processing, Scale bar: 500 nm.



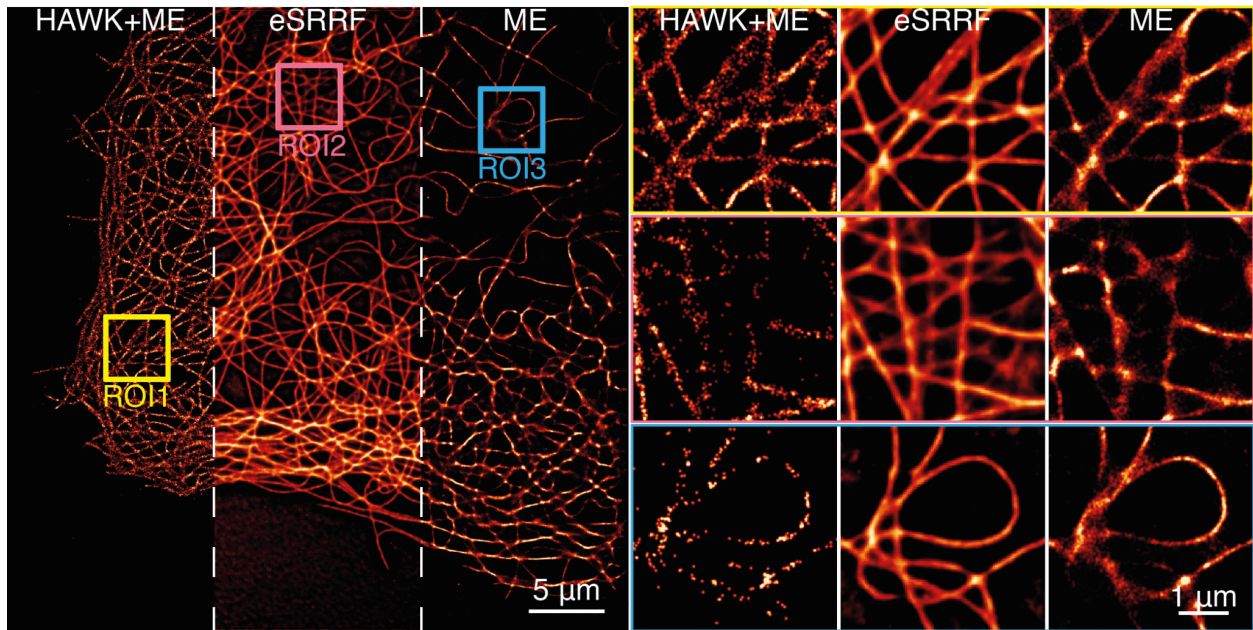

**Supplementary Fig. 3: Comparison of eSRRF, HAWK+ME and ME.** The Maximum Likelihood Estimation multi-emitter fitting (ME) was performed using ThunderSTORM<sup>30</sup>. Data shown corresponds to a DNA-PAINT acquisition of immunolabeled microtubules in fixed COS7 cells under TIRF illumination.

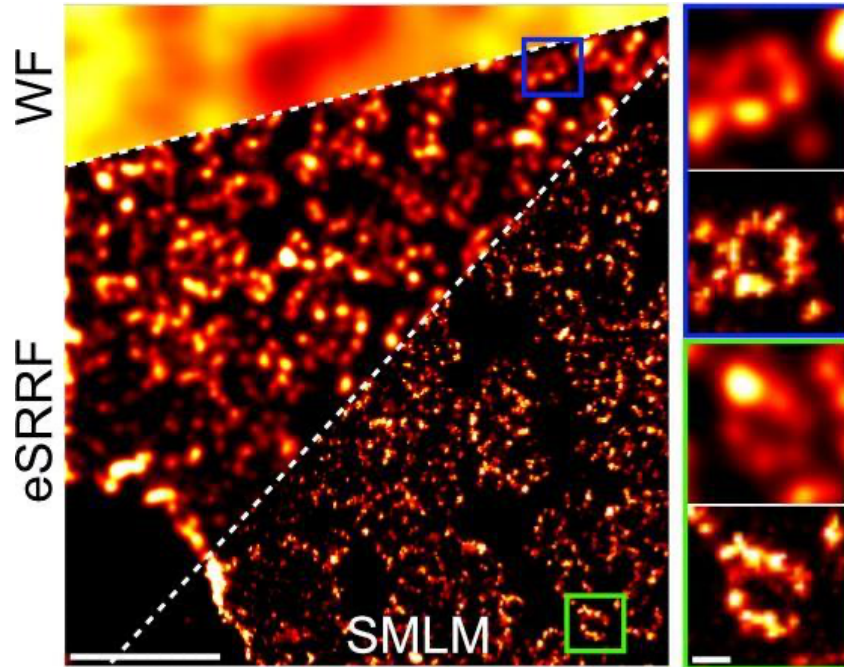

**Supplementary Fig. 4: eSRRF allows a fast preview of SMLM dataset reconstruction.** Widefield imaging (top left) of the nuclear pore complex. Fast eSRRF reconstruction preview (first 2000 frames shown) reveals the open ring structure (left panel middle area and insets top panels). While fast eSRRF can resolve the central pore which has a diameter of about 140 nm, the full 8-element ring with only 40 nm gaps is only resolved by single-molecule localization analysis of the full 20 000 frames image stack (left panel bottom area and insets lower panels). The FRC resolution is  $44.4 \pm 2.5$  nm, and  $35.1 \pm 6.3$  for eSRRF and SMLM, respectively) (Dataset from Heil et al.<sup>24</sup>), left panel: scale bar 1  $\mu$ m, insets on the right: scale bar 100 nm, FRC shown as mean  $\pm$  standard deviation.

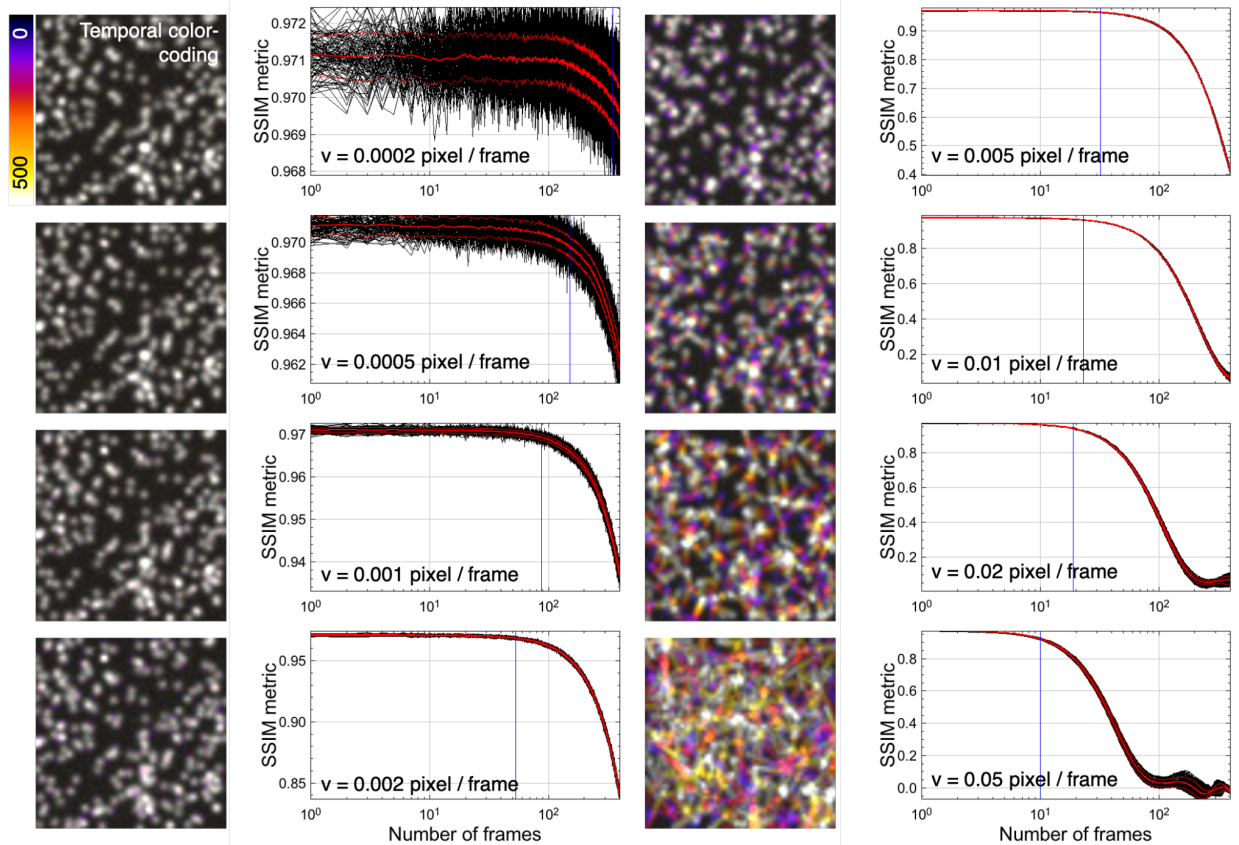

**Supplementary Fig. 5: tSSIM analysis of simulated moving particles.** Color coded projections of simulated image stacks displaying particles diffusing with various speeds  $v$  and the resulting SSIM metric progression over time. The tSSIM metric shows sensitivity as a function of particle displacement per frame. This can be used to estimate the size of the optimal time window for eSRRF processing to avoid movement artifacts.

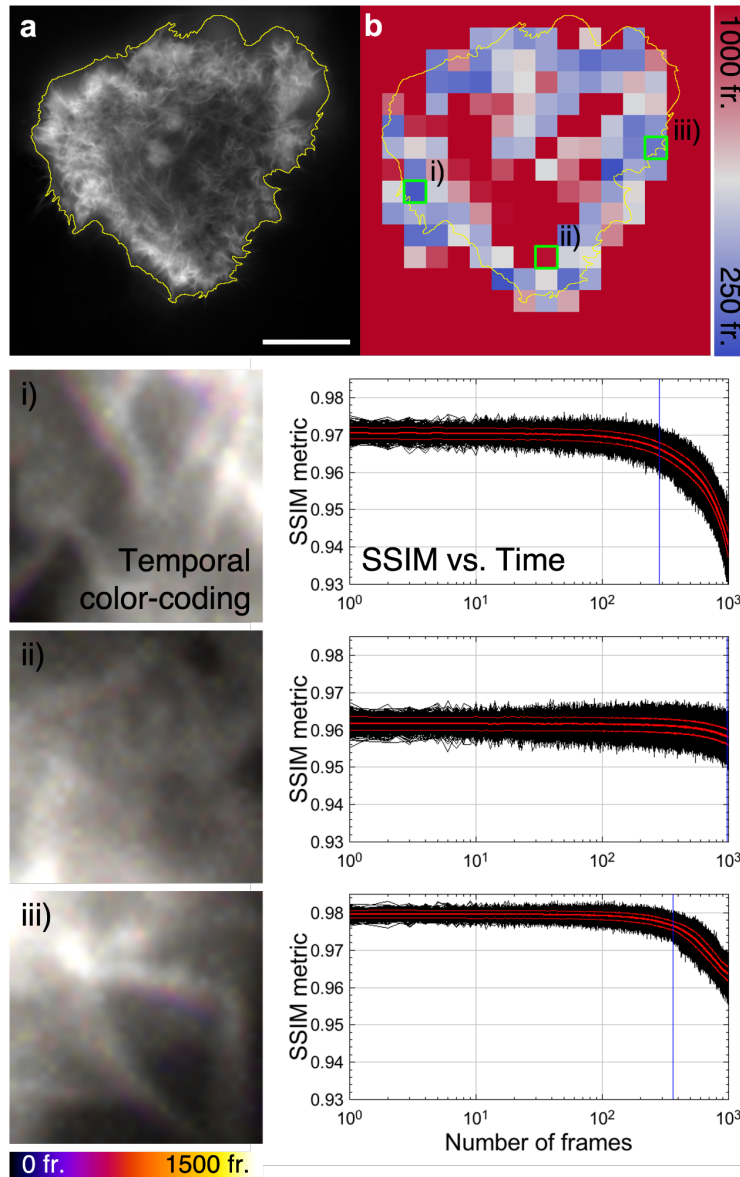

**Supplementary Fig. 6: tSSIM analysis performed over small image patches detects local dynamics of actin rearrangement in COS-7 cells.** **a** The actin network in live COS-7 cells expressing the marker GFP-UtrCH was acquired at 33 fps. **b** The tSSIM metric estimates the time range of motion within individual subsections of **a**). The different subsections highlighted in green display the color-coded projection of regions with **i**) fast, **ii**) slow, and **iii**) moderate speeds as is also reflected by the corresponding progression of the SSIM metric over time. Scale bar 20  $\mu\text{m}$ .

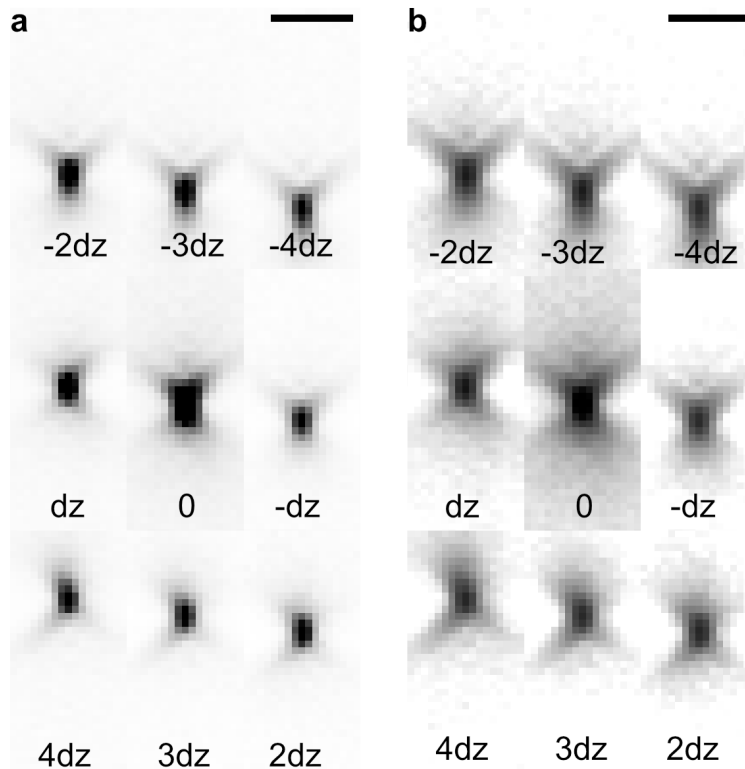

**Supplementary Fig. 7: 3D PSF in the nine focus planes of the MFM displays only minor aberrations and good radial symmetry.** x-z view of the PSF mapped with the bead calibration dataset displayed in **a** linear and **b** logarithmic brightness scale ( $\text{FWHM}_x=431\pm 19$  nm,  $\text{FWHM}_z=704\pm 45$  nm, mean  $\pm$  standard deviation). The focus offset  $dz$  between each focal plane is 390 nm. Scale bars 2  $\mu\text{m}$ .

# Supplementary Movies

**Supplementary Movie 1: Automated reconstruction parameter search tool implemented in eSRRF.** 200 frames of the live-cell TIRF imaging dataset of COS-7 cells expressing Lyn kinase – SkyJanS were analyzed with eSRRF covering the Radius  $R$  and Sensitivity  $S$  parameter space defined by  $R_{start} = 1$ , step size=0.5, number of steps=5 and  $S_{start} = 1$ , step size=1, number of steps=5. The eSRRF reconstruction for each parameter combination is presented on the left, while the corresponding image resolution and fidelity is marked with a yellow square in the respective FRC and RSP maps. At a low  $R$  values pixel artifacts are evident, while at higher  $R$  values and low  $S$  values no high resolution is achieved. If both,  $R$  and  $S$  values, are high the reconstruction displays a high degree of nonlinearity. The compromise between resolution and fidelity is represented in the QnR map which displays a maximum at the parameter combination  $R=2$  and  $S=4$  (marked in red).

**Supplementary Movie 2: Lattice-light sheet imaging of ER in live Jurkat T-cells enhanced by eSRRF.** Slice-by-slice processing of the data set allows the reconstruction of a volumetric view ( $79 \times 55 \times 35 \mu\text{m}^3$ ) of the ER network in live Jurkat T-cells at a rate of 7.6 mHz.

**Supplementary Movie 3: Live-cell HiLO-TIRF of COS-7 cells expressing PrSS-mEmerald-KDEL marking the ER lumen.** WF and eSRRF reconstruction of COS-7 cells expressing a luminal ER marker allows live-cell super-resolution imaging (FRC resolution HiLO/eSRRF (mean  $\pm$  standard deviation):  $254 \pm 11/143 \pm 56$  nm) at a sampling rate of 1 Hz. Rolling window analysis allows to speed up temporal sampling to 10 Hz, FRC shown as mean  $\pm$  standard deviation.

**Supplementary Movie 4: Live-cell imaging of actin dynamics in U2OS cells expressing SkyJanS- $\beta$ Actin.** The dynamic actin rearrangement in U2OS cells transiently expressing SkyJanS- $\beta$ Actin is visualized over a time course of 12 hours by acquiring substacks of 50 frames to generate a super-resolved eSRRF reconstruction at 10 min intervals. eSRRF processing allows to improve the resolution significantly (FRC resolution est. SDC/eSRRF:  $484 \pm 53$  nm/ $151 \pm 77$  nm). SRRF processing does not achieve the same level of resolution improvement (FRC resolution est.:  $215 \pm 63$  nm). Scale bar  $10 \mu\text{m}$ , FRC shown as mean  $\pm$  standard deviation.

**Supplementary Movie 5: Live-cell 3D eSRRF of mitochondria dynamics with MFM.** Live-cell volumetric imaging of U2OS cells expressing TOM20-Halo, loaded with JF549 with MFM (top left: single xy plane, middle left: single xz plane, bottom left: 3D rendering, FRC resolution estimate:  $317 \pm 22$  nm) of a  $20 \times 20 \times 3.6 \mu\text{m}^3$  observed over 3 min 18 sec allows to reconstruct a super-resolved in 3D view of them mitochondria dynamics with eSRRF processing ((top right: single xy plane, middle right: single xz plane, bottom right: 3D rendering, right, FRC resolution est., xy:  $124 \pm 60$  nm/xz:  $222 \pm 26$  nm)  $\sim 1$ Hz, scale bar  $3 \mu\text{m}$ , FRC shown as mean  $\pm$  standard deviation.

# References

1. Marsh, R. J. *et al.* Artifact-free high-density localization microscopy analysis. *Nat. Methods* **15**, 689–692 (2018).
2. Culley, S. *et al.* Quantitative mapping and minimization of super-resolution optical imaging artifacts. *Nat. Methods* **15**, 263–266 (2018).
3. Parthasarathy, R. Rapid, accurate particle tracking by calculation of radial symmetry centers. *Nat. Methods* **9**, 724–726 (2012).
4. Roberts, L. Machine perception of 3-D solids, optical and electro-optical information processing. (1965).
5. Mendel, J. M. Tutorial on higher-order statistics (spectra) in signal processing and system theory: theoretical results and some applications. *Proc. IEEE* **79**, 278–305 (1991).
6. Abrahamsson, S. *et al.* Fast multicolor 3D imaging using aberration-corrected multifocus microscopy. *Nat. Methods* **10**, 60–63 (2013).
7. Hajj, B. *et al.* Whole-cell, multicolor superresolution imaging using volumetric multifocus microscopy. *Proc. Natl. Acad. Sci.* **111**, 17480–17485 (2014).
8. Hajj, B., Oudjedi, L., Fiche, J.-B., Dahan, M. & Nollmann, M. Highly efficient multicolor multifocus microscopy by optimal design of diffraction binary gratings. *Sci. Rep.* **7**, 5284 (2017).
9. Laine, R. F. *et al.* NanoJ: a high-performance open-source super-resolution microscopy toolbox. *J. Phys. Appl. Phys.* **52**, 163001 (2019).
10. Royer, L. A. *et al.* ClearVolume: open-source live 3D visualization for light-sheet microscopy. *Nat. Methods* **12**, 480–481 (2015).
11. Gustafsson, N. *et al.* Fast live-cell conventional fluorophore nanoscopy with ImageJ through super-resolution radial fluctuations. *Nat. Commun.* **7**, 12471 (2016).
12. Agarwal, K. & Macháň, R. Multiple signal classification algorithm for super-resolution

- fluorescence microscopy. *Nat. Commun.* **7**, 13752 (2016).
13. Cox, S. *et al.* Bayesian localization microscopy reveals nanoscale podosome dynamics. *Nat. Methods* **9**, 195–200 (2012).
  14. Chen, R. *et al.* Efficient super-resolution volumetric imaging by radial fluctuation Bayesian analysis light-sheet microscopy. *J. Biophotonics* **13**, (2020).
  15. Dertinger, T., Colyer, R., Iyer, G., Weiss, S. & Enderlein, J. Fast, background-free, 3D super-resolution optical fluctuation imaging (SOFI). *Proc. Natl. Acad. Sci.* **106**, 22287–22292 (2009).
  16. Zhao, W., Liu, J. & Li, H. Ultrafast super-resolution imaging via auto-correlation two-step deconvolution. in *Ultrafast Nonlinear Imaging and Spectroscopy VIII* vol. 11497 42–49 (SPIE, 2020).
  17. Zhao, W. *et al.* Enhancing detectable fluorescence fluctuation for high-throughput and four-dimensional live-cell super-resolution imaging. Preprint at <https://doi.org/10.1101/2022.12.12.520072> (2022).
  18. Zeng, Z., Ma, J. & Xu, C. Cross-cumulant enhanced radially nanoscopy for multicolor superresolution subcellular imaging. *Photonics Res.* **8**, 893 (2020).
  19. Zeng, Z., Ma, J., Xi, P. & Xu, C. Joint tagging assisted fluctuation nanoscopy enables fast high-density super-resolution imaging. *J. Biophotonics* **11**, e201800020 (2018).
  20. Gong, X. *et al.* Achieving increased resolution and reconstructed image quality with gradient variance modified super-resolution radial fluctuations. Preprint at <https://doi.org/10.21203/rs.3.rs-608461/v1> (2021).
  21. Shaib, A. H. *et al.* Expansion microscopy at one nanometer resolution. Preprint at <https://doi.org/10.1101/2022.08.03.502284> (2022).
  22. Kyllies, D. *et al.* Expansion-enhanced super-resolution radial fluctuations enable nanoscale molecular profiling of pathology specimens. *Nat. Nanotechnol.* **18**, 336–342 (2023).
  23. Moeyaert, B. & Dedeker, P. A comprehensive dataset of image sequences covering 20



fluorescent protein labels and 12 imaging conditions for use in super-resolution imaging.

*Data Brief* **29**, 105273 (2020).

24. Heil, H. S. *et al.* Sharpening emitter localization in front of a tuned mirror. *Light Sci. Appl.* **7**, 99 (2018).
25. Geissbuehler, S. *et al.* Live-cell multiplane three-dimensional super-resolution optical fluctuation imaging. *Nat. Commun.* **5**, 5830 (2014).
26. Descloux, A. *et al.* Combined multi-plane phase retrieval and super-resolution optical fluctuation imaging for 4D cell microscopy. *Nat. Photonics* **12**, 165–172 (2018).
27. Zhao, Y. *et al.* Isotropic super-resolution light-sheet microscopy of dynamic intracellular structures at subsecond timescales. *Nat. Methods* **19**, 359–369 (2022).
28. Mangeat, T. *et al.* Super-resolved live-cell imaging using random illumination microscopy. *Cell Rep. Methods* **1**, 100009 (2021).
29. Bodén, A. *et al.* Volumetric live cell imaging with three-dimensional parallelized RESOLFT microscopy. *Nat. Biotechnol.* **39**, 609–618 (2021).
30. Ovesný, M., Křížek, P., Borkovec, J., Švindrych, Z. & Hagen, G. M. ThunderSTORM: a comprehensive ImageJ plug-in for PALM and STORM data analysis and super-resolution imaging. *Bioinformatics* **30**, 2389–2390 (2014).
